# Supplementary material for: In vitro and in vivo Efficacy of a Synergistic Combination of Itraconazole and Verapamil Against Aspergillus fumigatus
Source: PubMed Central journal article supplement (PMC6567931; doi:10.3389/fmicb.2019.01266), 2019-06-07
Supplement: Data_Sheet_1.pdf [file Data_Sheet_1.pdf]

## Supplement data

### Supplementary Fig S1 VER improves the growth inhibition of ITC on agar plates against *A. fumigatus*.

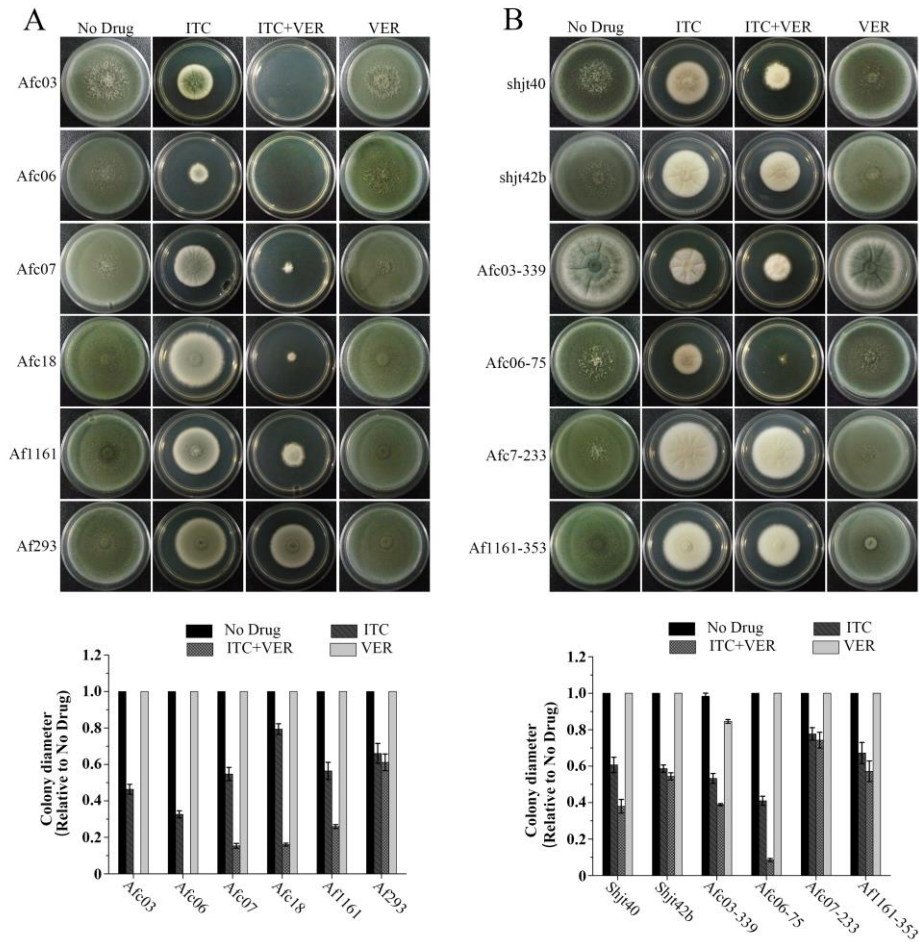

Testing of growth inhibition on agar plates by itraconazole (ITC) (0.1  $\mu\text{g/ml}$ ) with verapamil (VER) (200  $\mu\text{g/ml}$  for A and 600  $\mu\text{g/ml}$  for B) against ITC-susceptible (A) and ITC-resistant (B) *A. fumigatus* isolates.

**Supplementary Table S1 Drug interaction evaluation of *A. fumigatus* strains.**

| Strains     | MIC ( $\mu\text{g/ml}$ ) |       |          |     | ITC-VER Interaction |                |
|-------------|--------------------------|-------|----------|-----|---------------------|----------------|
|             | Single                   |       | Combined |     | FICI                | Interpretation |
|             | ITC                      | VER   | ITC      | VER |                     |                |
| Af1161      | 0.25                     | >9600 | 0.0625   | 40  | 0.254               | SYN            |
| Af1161-AEQ  | 0.25                     | >9600 | 0.0625   | 40  | 0.254               | SYN            |
| Af1161-Luc2 | 0.25                     | >9600 | 0.0625   | 40  | 0.254               | SYN            |

**Supplementary Fig S2 Bioluminescence of the luciferase reporter strains.**

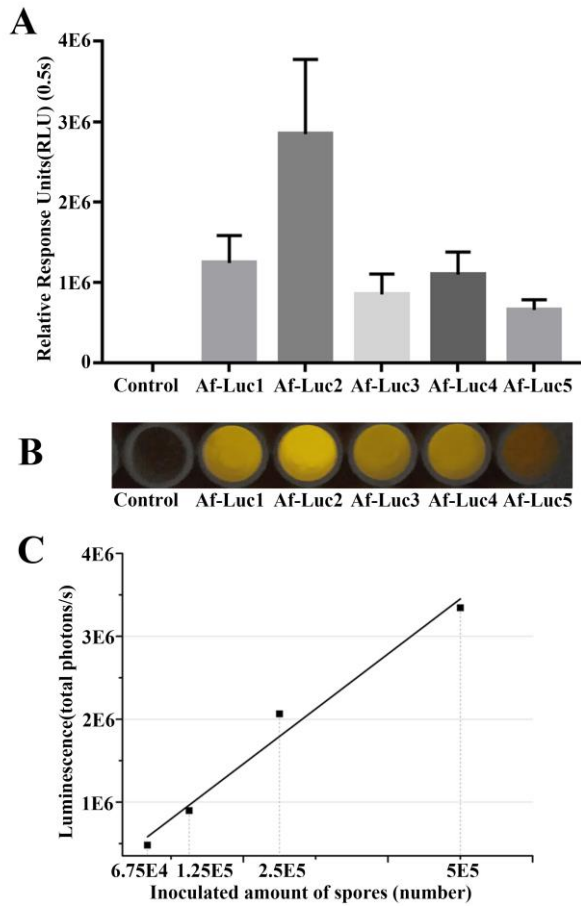

A and B. Comparison of light emission (A) and visual observation (B) of Af1161 (as control) and five reporter *A. fumigatus* strains carrying the codon-optimized luciferase gene. The respective strain was inoculated in a white 96-well plate with  $2.5 \times 10^5$  conidia for 12 h at 37°C. Luminescence was assayed using a microplate reader after adding D-luciferin. Average values of three independent replicates are shown with SD error bars.

C. Correlation of bioluminescence and inoculated amount of Af-Luc2 spores using the IVIS Lumina XR system. Average values of three independent replicates are shown with SD error bars.

**Supplementary Fig S3 Body weight monitoring of therapy efficacy.**

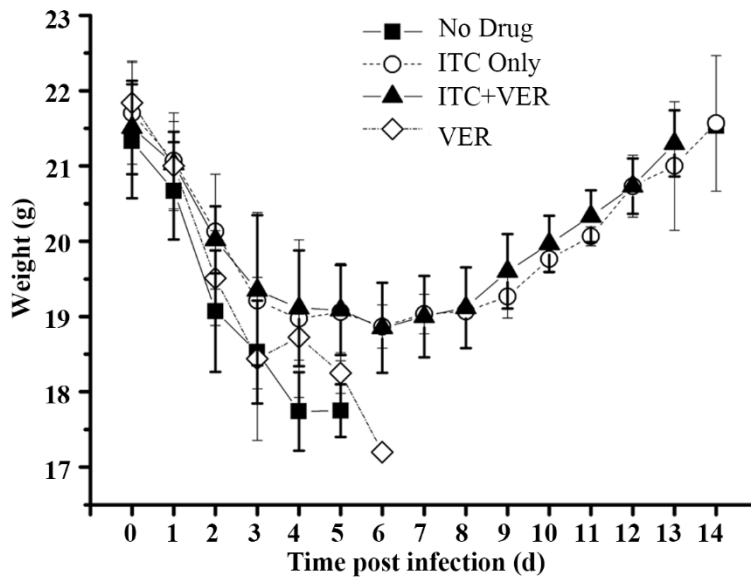

Average values (N=10) are shown with SD error bars.

**Supplementary Fig S4 Effect of ITC and VER ( $\mu\text{g/ml}$ ) on inhibition of biofilm formation of Afc03 strain.**

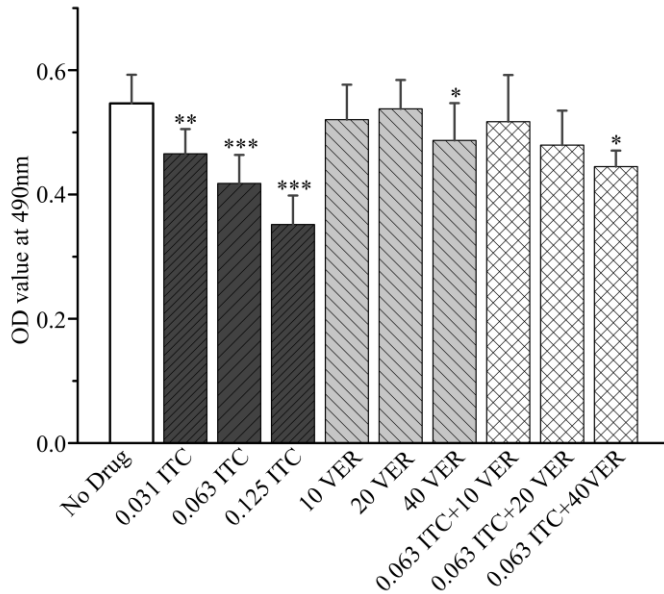

ITC alone was inhibitory at 0.031-0.125  $\mu\text{g/ml}$  compared to the No Drug control (left bar). (\*\*,  $p < 0.01$ , \*\*\*,  $p < 0.001$ ). VER(40  $\mu\text{g/ml}$ ) alone inhibited *Aspergillus* biofilm formation (seventh bar from left) (\*,  $p < 0.05$ ). ITC (0.063  $\mu\text{g/ml}$ )+VER (40  $\mu\text{g/ml}$ ) was also inhibitory, as shown in tenth bar from left (\*,  $p < 0.05$ ). However, no detectable difference was found in VER (40  $\mu\text{g/ml}$ ) alone and ITC (0.063  $\mu\text{g/ml}$ )+VER (40  $\mu\text{g/ml}$ ).
